# Supplementary material
Source: Springer Nature journal article supplement (https://www.springermedizin.de/resource/supplementary/12936_2012_2150_MOESM2_ESM.pdf/9542770)
Supplement: MOESM2 [file 9542770]

# TRIAL PROFILE

154 screened malaria patients

4 patients excluded

150 randomized patients

Guwahati: 68 patients  
Goa: 28 patients  
Mangalore: 54 patients

101

Randomized to DP

Day 3-28

9 Lost to follow-up; 1 AE

Day 29-42

4 Lost to follow-up

Day 43-63

2 Lost to follow-up

85 patients completed the study

ITT population: 101  
PP population: 80

49

Randomized to A+M

Day 3-28

6 Lost to follow-up

Day 29-42

2 Lost to follow-up

Day 43-63

No lost to follow-up

41 patients completed the study

ITT population: 49  
PP population: 41
